# Supplementary material for: Comparison of mRNA localization and regulation during endoplasmic reticulum stress in Drosophila cells
Source: PubMed Central journal article supplement — Mol Biol Cell. 2013 Jan 1;24(1):14–20. doi: 10.1091/mbc.E12-06-0491 (PMC3530775; doi:10.1091/mbc.e12-06-0491), 2013-01-01
Supplement: supp_E12-06-0491v1_CombinedSupMats.pdf [file supp_E12-06-0491v1_CombinedSupMats.pdf]

Supplementary materials for Gaddam et al, Comparison of mRNA localization and regulation during endoplasmic reticulum stress in *Drosophila* cells

**Table S1.** Statistical analysis of mRNA decay changes during ER stress. We conducted paired t-tests (identical spots were paired) for differences between actinomycin treated samples in the presence vs. absence of ER stress and between control vs. Ire1 RNAi samples in the presence of ER stress. Shown are the p-values from t-tests for spots within a given window of FM values, defined by a sliding window of 50 spots. Similar results were obtained using a sliding window of 25 spots or with a defined range of FM values (for example, an FM range of 0.2).

| range of FM values | pvalue for paired t-test,<br>control -DTT vs. control +DTT | pvalue for paired t-test,<br>control +DTT vs. Ire1 RNAi +DTT |
|--------------------|------------------------------------------------------------|--------------------------------------------------------------|
| above 0.85         | <10 <sup>-5</sup>                                          | <10 <sup>-5</sup>                                            |
| 0.82-0.85          | <10 <sup>-5</sup>                                          | <10 <sup>-5</sup>                                            |
| 0.80-0.82          | <10 <sup>-5</sup>                                          | <10 <sup>-5</sup>                                            |
| 0.76-0.80          | <10 <sup>-5</sup>                                          | <10 <sup>-5</sup>                                            |
| 0.74-0.76          | <10 <sup>-5</sup>                                          | <10 <sup>-5</sup>                                            |
| 0.71-0.74          | <10 <sup>-5</sup>                                          | <10 <sup>-5</sup>                                            |
| 0.68-0.71          | <10 <sup>-5</sup>                                          | <10 <sup>-5</sup>                                            |
| 0.66-0.68          | <10 <sup>-5</sup>                                          | <10 <sup>-5</sup>                                            |
| 0.63-0.66          | <10 <sup>-5</sup>                                          | <10 <sup>-5</sup>                                            |
| 0.60-0.63          | <10 <sup>-5</sup>                                          | <10 <sup>-5</sup>                                            |
| 0.58-0.60          | 0.0003                                                     | <10 <sup>-5</sup>                                            |
| 0.57-0.58          | 0.0003                                                     | 0.0009                                                       |
| 0.55-0.57          | 0.00001                                                    | <10 <sup>-5</sup>                                            |
| 0.54-0.55          | 0.0006                                                     | 0.00006                                                      |
| 0.53-0.54          | 0.35                                                       | 0.11                                                         |
| 0.52-0.53          | 0.02                                                       | 0.02                                                         |
| 0.51-0.52          | 0.39                                                       | 0.17                                                         |
| 0.50-0.51          | 0.33                                                       | 0.48                                                         |

**Table S2.** mRNAs displaying weak RIDD (two-fold less degradation than predicted based on FM), for which the expected RIDD score is <-1.0 (i.e., two-fold degradation is expected based on FM). The expected scores were determined by a linear fit of the RIDD score vs. FM for all mRNAs with FM>0.54. GO terms enriched in this list, compared to all RNAs from the array data with expected RIDD scores of <-1.0, included 5 terms associated with neuron development and differentiation (N=3, p-value< 0.025, calculated using the DAVID Bioinformatic database (Huang da *et al.*, 2009)). NA=not annotated.

| gene ID        | gene name                                                  | RIDD factor | FM   | function               | signal sequence |
|----------------|------------------------------------------------------------|-------------|------|------------------------|-----------------|
| <b>CG7013</b>  | Mesencephalic astrocyte-derived neurotrophic factor (ManF) | 0.37        | 0.87 | neuron homeostasis     | Y               |
| <b>CG13388</b> | A kinase anchor protein 200 (Akap200)                      | 0.59        | 0.80 | signaling              | N               |
| <b>CG10497</b> | Syndecan                                                   | 0.13        | 0.79 | axon guidance          | Y               |
| <b>CG5885</b>  | -                                                          | -0.05       | 0.83 | protein trafficking    | N               |
| <b>CG10811</b> | eukaryotic translation initiation factor 4G                | 0.07        | 0.79 | translation            | N               |
| <b>CG12918</b> | -                                                          | 0.00        | 0.80 | NA                     | Y               |
| <b>CG11081</b> | plexin A (plexA)                                           | -0.13       | 0.83 | axon guidance          | Y               |
| <b>CG7523</b>  | -                                                          | -0.07       | 0.81 | NA                     | N               |
| <b>CG10470</b> | -                                                          | -0.13       | 0.82 | NA                     | Y               |
| <b>CG1291</b>  | -                                                          | 0.00        | 0.77 | glycolipid transferase | N               |

**Table S3.** mRNAs displaying strong RIDD (two-fold more degradation than predicted based on FM), for which the expected RIDD score is <-1.0 (i.e., two-fold degradation is expected based on FM). The expected scores were determined by a linear fit of the RIDD score vs. FM for all mRNAs with FM>0.54. GO terms enriched in this list, compared to all RNAs from the array data with expected RIDD scores of <-1.0, included 4 terms associated with the extracellular matrix and cell adhesion (N=3-5, p-value< 0.025, calculated using the DAVID Bioinformatic database (Huang da *et al.*, 2009)). NA=not annotated.

| gene ID | gene name                      | RIDD factor | FM   | function                | signal sequence |
|---------|--------------------------------|-------------|------|-------------------------|-----------------|
| CG3979  | I'm not dead yet               | -4.82       | 0.83 | transmembrane transport | N               |
| CG8947  | 26-29kD-proteinase             | -4.41       | 0.90 | NA (protease)           | Y               |
| CG6453  | -                              | -3.67       | 0.87 | NA                      | Y               |
| CG7123  | LanB1                          | -3.36       | 0.89 | embryonic morphogenesis | Y               |
| CG6378  | BM-40-SPARC (sparc)            | -3.30       | 0.91 | cell adhesion           | Y               |
| CG10449 | Catecholamines up              | -3.13       | 0.86 | transmembrane transport | Y               |
| CG3984  | -                              | -3.12       | 0.85 | NA                      | Y               |
| CG3322  | Laminin B2                     | -3.05       | 0.89 | embryonic morphogenesis | Y               |
| CG4821  | Tequila                        | -3.04       | 0.90 | NA (protease)           | Y               |
| CG14464 | -                              | -2.95       | 0.85 | NA                      | N               |
| CG2915  | -                              | -2.83       | 0.79 | NA (protease)           | Y               |
| CG4572  | -                              | -2.69       | 0.85 | RNA transport           | Y               |
| CG1471  | Ceramidase                     | -2.66       | 0.84 | synaptic transmission   | Y               |
| CG3488  | alpha/beta hydrolase 2 (Hydr2) | -2.47       | 0.88 | lipid metabolism        | Y               |
| CG9302  | -                              | -2.45       | 0.86 | redox homeostasis       | Y               |
| CG11527 | Tiggrin                        | -2.43       | 0.87 | axon guidance           | Y               |
| CG2206  | lethal (1) G0193               | -2.32       | 0.85 | NA                      | Y               |
| CG1275  | -                              | -2.32       | 0.82 | NA                      | Y               |
| CG12369 | Lachesin                       | -2.18       | 0.77 | tracheal development    | Y               |

**Table S4.** Confirmed RIDD targets from mammalian cells. Confirmed RIDD targets from cell lines displayed increased decay rates during ER stress in wildtype cells (not overexpressing Ire1); for liver samples mRNAs displayed decreased abundance in response to tunicamycin-injection.

| RIDD target                                                    | Sequence ID  | Cell type or organism       | Xbp1-like cleavage site | Reference                      |
|----------------------------------------------------------------|--------------|-----------------------------|-------------------------|--------------------------------|
| Heparan-alpha-glucosaminide N-acetyltransferase                | NM_029884    | Mouse embryonic fibroblasts | yes                     | (Hollien <i>et al.</i> , 2009) |
| Biogenesis of lysosome-related organelles complex-1, subunit 1 | NM_015740    | Mouse embryonic fibroblasts | yes                     | (Hollien <i>et al.</i> , 2009) |
| Scavenger receptor class A, member 3                           | NM_172604    | Mouse embryonic fibroblasts | yes                     | (Hollien <i>et al.</i> , 2009) |
| Platelet derived growth factor receptor, beta polypeptide      | NM_001146268 | Mouse embryonic fibroblasts | yes                     | (Hollien <i>et al.</i> , 2009) |
| Peripheral myelin protein                                      | NM_008885    | Mouse embryonic fibroblasts | yes                     | (Hollien <i>et al.</i> , 2009) |
| Collagen, type VI, alpha 1                                     | NM_009933    | Mouse embryonic fibroblasts | yes                     | (Hollien <i>et al.</i> , 2009) |
| Insulin (Ins1)                                                 | NM_019129    | INS-1 (rat insulinoma)      | no                      | (Han <i>et al.</i> , 2009)     |
| Glycosyltransferase-like 1B                                    | NM_199107    | INS-1 (rat insulinoma)      | yes                     | (Han <i>et al.</i> , 2009)     |
| BiP                                                            | NM_013083    | INS-1 (rat insulinoma)      | yes                     | (Han <i>et al.</i> , 2009)     |
| Cytochrome P450 family 1, subfamily a, polypeptide 2           | NM_009993    | mouse liver                 | yes                     | (Hur <i>et al.</i> , 2012)     |
| Cytochrome P450 family 2, subfamily e, polypeptide 1           | NM_021282    | mouse liver                 | no                      | (Hur <i>et al.</i> , 2012)     |

**Table S5.** Primers used for qPCR.

| <b>Gene Name</b>                     | <b>Annotation symbol</b> | <b>Primer1</b>         | <b>Primer 2</b>        |
|--------------------------------------|--------------------------|------------------------|------------------------|
| <b>Act5C (actin)</b>                 | CG4027                   | ATGTGTGACGAAGAAGTTGCT  | GAAGCACTTGCGGTGCACAAT  |
| <b>sparc</b>                         | CG6378                   | AAAATGGGCTGTGTCCTAACC  | TGCAGCACAATCTACTCAATCC |
| <b>Hydr2</b>                         | CG3488                   | CGCATACACGACTATTTAACGC | TTTGGTTTCTCTTTGATTTCCG |
| <b>Akap200</b>                       | CG13388                  | AACAACAAAAGAACGCAACG   | TGGATGTGTTTTTGGGGACT   |
| <b>Manf</b>                          | CG7013                   | GAGGAGGACTGCGAAGTTTG   | GTGCGTCCTTCTTTCAGC     |
| <b>CG5885</b>                        | CG5885                   | TCCTGTTGTCCTGGTGAC     | CGTAGTCGGCTACCTCGTTC   |
| <b>plexA</b>                         | CG11081                  | GGCAAAGACTCACCAAGCTC   | TTTAAAAGCCAATCGCTGCT   |
| <b>Atf4/crc</b>                      | CG8669                   | AGACGCTGCTTCGCTTCCTTC  | GCCCGTAAGTGCAGTACGCT   |
| <b>Gadd34</b>                        | CG3825                   | CGGTGAGGATGAAAATACCG   | GTCAGGACGGCATTGAGAAT   |
| <b>Ribosomal Protein L19 (Rpl19)</b> | CG2746                   | AGGTCGGACTGCTTAGTGACC  | CGCAAGCTTATCAAGGATGG   |
| <b>sparc reporters</b>               |                          | TGCAGCACAATCTACTCAATCC | GTAGAATCGAGACCGAGGAGAG |
| <b>GFP reporter</b>                  |                          | CCTGAAGTTCATCTGCACCA   | TGCTCAGGTAGTGGTTGTCG   |

## References for Supplementary Tables

- Han, D., Lerner, A.G., Vande Walle, L., Upton, J.P., Xu, W., Hagen, A., Backes, B.J., Oakes, S.A., and Papa, F.R. (2009). IRE1alpha kinase activation modes control alternate endoribonuclease outputs to determine divergent cell fates. *Cell* *138*, 562-575.
- Hollien, J., Lin, J.H., Li, H., Stevens, N., Walter, P., and Weissman, J.S. (2009). Regulated Ire1-dependent decay of messenger RNAs in mammalian cells. *J Cell Biol* *186*, 323-331.
- Huang da, W., Sherman, B.T., and Lempicki, R.A. (2009). Systematic and integrative analysis of large gene lists using DAVID bioinformatics resources. *Nat Protoc* *4*, 44-57.
- Hur, K.Y., So, J.S., Ruda, V., Frank-Kamenetsky, M., Fitzgerald, K., Koteliansky, V., Iwawaki, T., Glimcher, L.H., and Lee, A.H. (2012). IRE1alpha activation protects mice against acetaminophen-induced hepatotoxicity. *J Exp Med* *209*, 307-318.

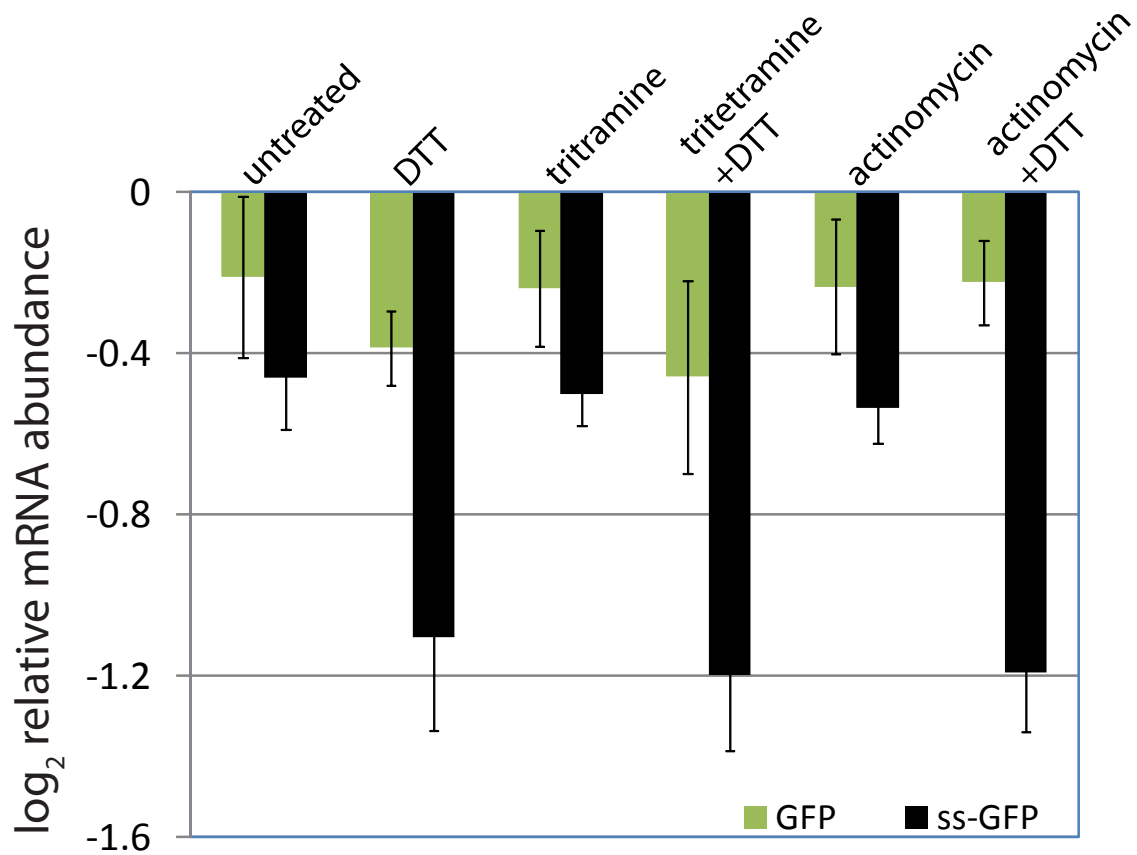

Figure S1. Copper-washout is an effective method of turning off transcription of reporter mRNAs. GFP and ss-GFP (from Figure 1) were placed under the control of the copper-inducible metallothionein promoter and stably transfected into *Drosophila* S2 cells. We induced expression for 3 hours, removed copper and added either triethylenetetramine (200  $\mu$ M) to chelate remaining copper or actinomycin (1  $\mu$ g/mL) to block transcription. We then measured mRNA levels after 3 hours in the absence and presence DTT (2 mM), by qPCR. GFP mRNA levels were normalized to that of Rpl19. Shown is the average and SD of 3 independent experiments.

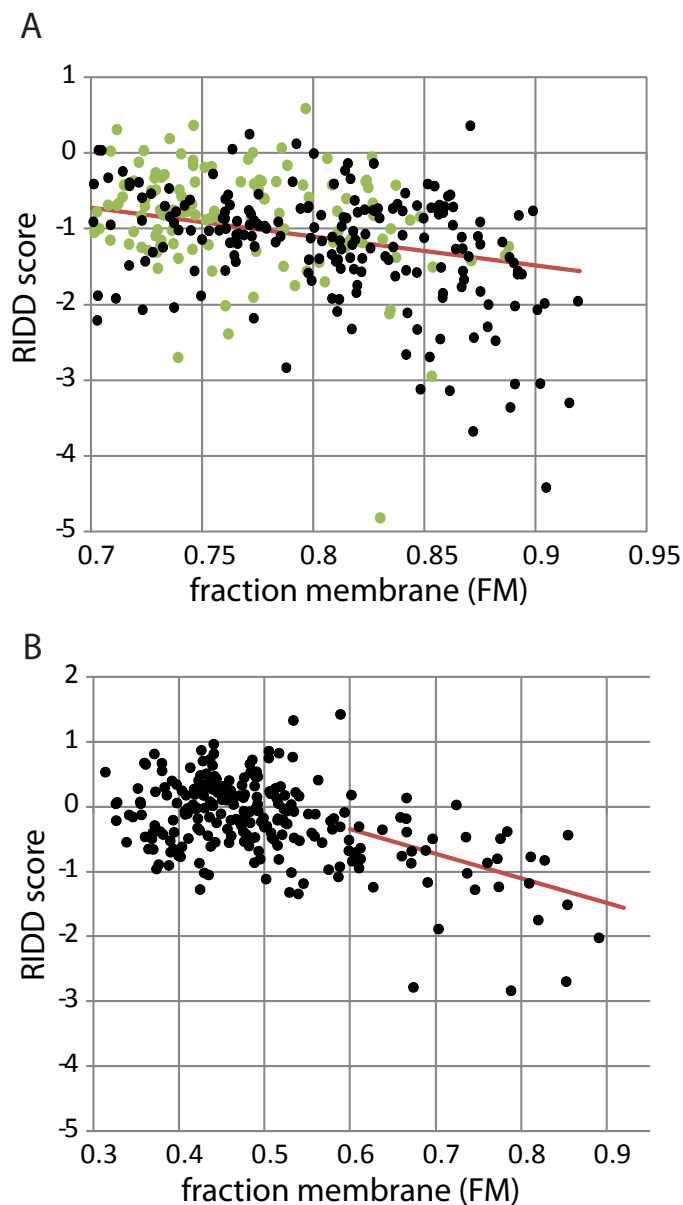

Figure S2. RIDD depends on membrane association of the target mRNA and not on the presence of a predicted signal sequence or a canonical Ire1 cleavage site. (A) RIDD score vs. FM as in Figure 2B-C for mRNAs with FM > 0.70 and containing predicted signal sequence coding regions (black) or lacking both predicted signal sequence and transmembrane domain coding regions (green). (B) RIDD score vs. FM for mRNAs containing predicted Ire1 cleavage sites, defined as a stem-loop structure with a loop sequence of CnGCnGn and a 5 base-pair stem, allowing for GC, AU, and GU pairs. For all, the red line indicates a linear fit of the entire dataset with FM > 0.54, as in Figure 2.



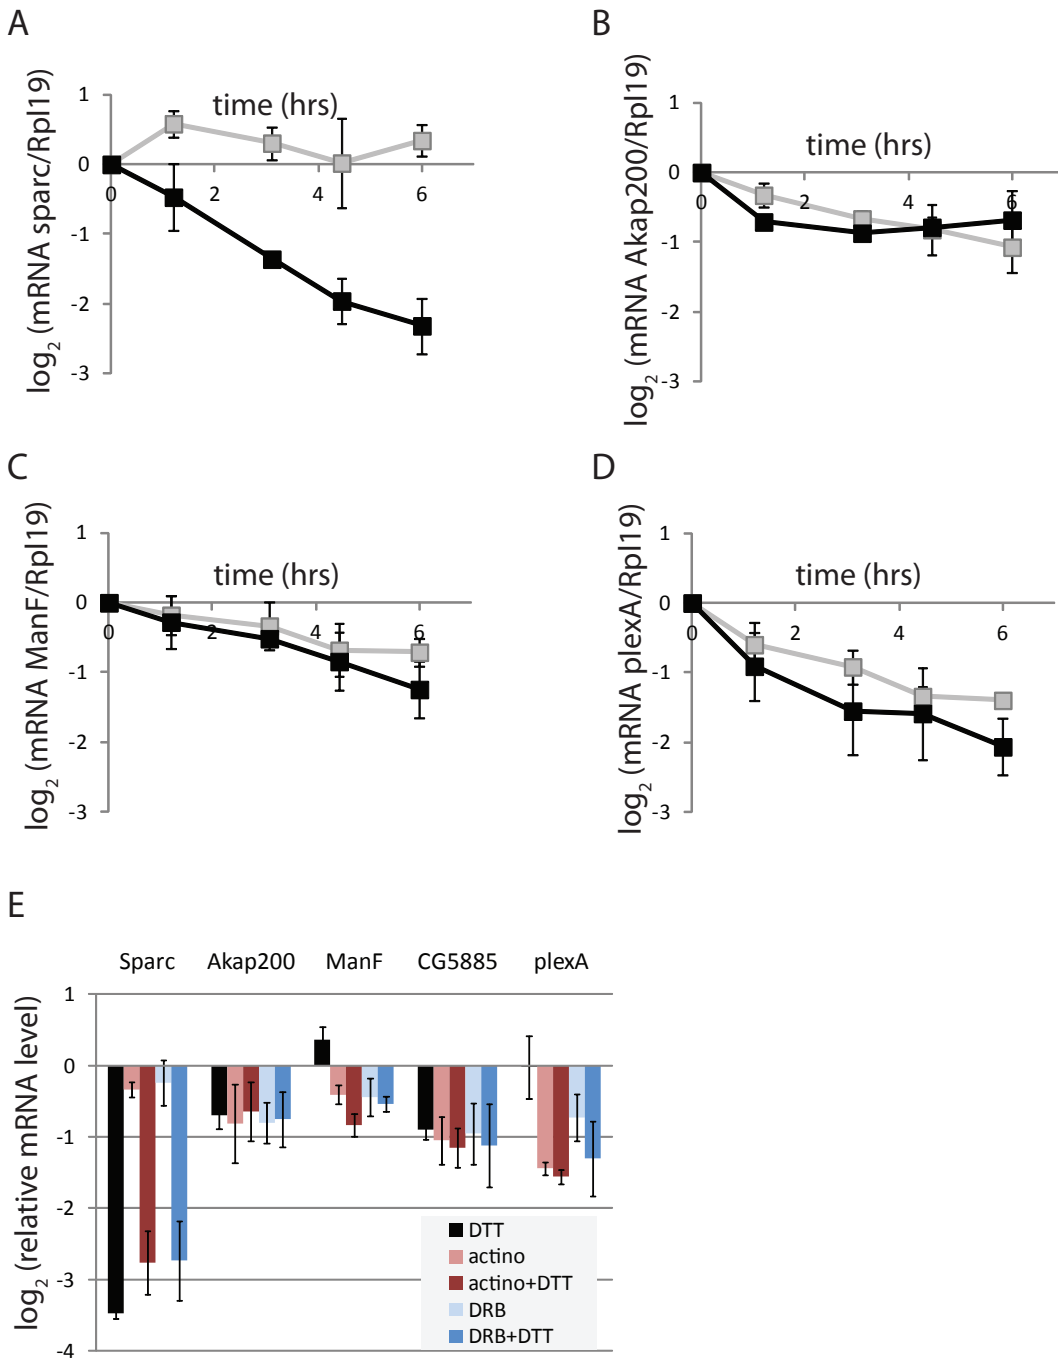

Figure S3. Confirmation of the protection from RIDD. (A-D) We inhibited transcription in *Drosophila* S2 cells (1  $\mu$ g/mL actinomycin), induced ER stress (2 mM DTT, black squares, compared to no treatment, gray squares), and collected RNA samples over time. We measured mRNA levels compared to Rpl19 by qPCR; shown are the averages and SDs for 2 independent experiments. (E) We either left cells untreated or inhibited transcription using 5  $\mu$ g/mL actinomycin (actino) or 100  $\mu$ M DRB, and collected cells following 4.5 hrs in the absence or presence of ER stress (2 mM DTT). Shown are the mRNA levels relative to Rpl19 and normalized to RNA from untreated cells, with averages and SDs from 3 independent experiments.

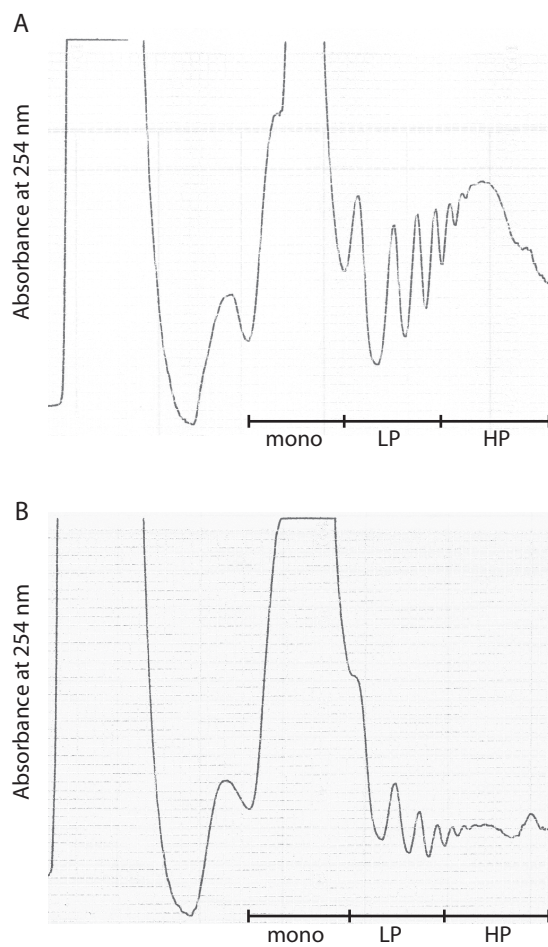

Figure S4. Polysome profiles of S2 cells in the absence (A) and presence (B) of ER stress (2 mM DTT, 20 min). Fractions containing monosomes (mono), low density polysomes (LP) or high density polysomes (HP) were collected for analysis.
